# Supplementary material
Source: PubMed Central journal article supplement (PMC6215403)
Supplement: develop-145-167346-s1.pdf [file develop-145-167346-s1.pdf]

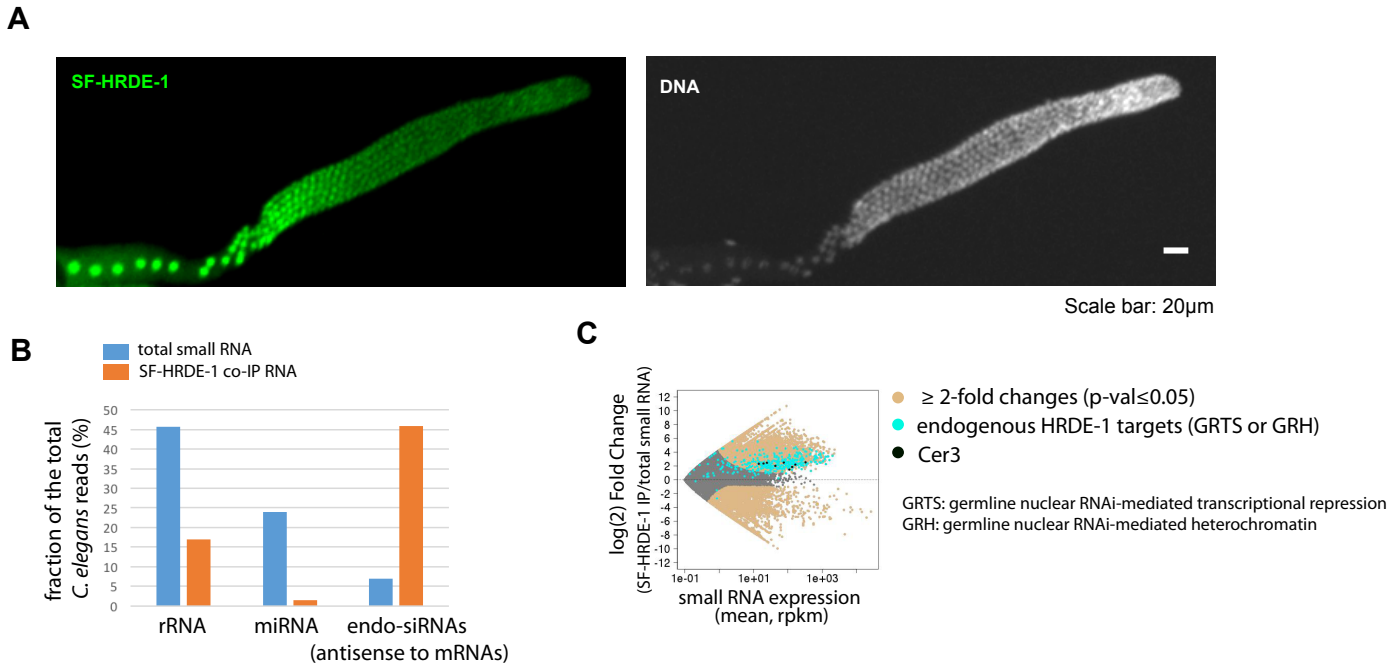

**Figure S1. Enrichment of HRDE-1-bound endo-siRNAs by immunoprecipitation.**

(A) A representative image of anti-FLAG immunofluorescence microscopy of a dissected gonad showing that SF-HRDE-1 is predominantly expressed in germline nuclei. HRDE-1 is tagged with Strep II-FLAG peptide (SF-tag) at the N-terminus. DNA: DAPI stain. Scale bar: 20  $\mu\text{m}$ . (B) SF-HRDE-1 immunoprecipitation (IP) enriched endo-siRNAs (antisense to mRNAs), but not miRNAs or rRNAs. Protein extract of SF-HRDE-1-expressing adults was used for the IP. (C) SF-HRDE-1 IP enriched endo-siRNAs of the endogenous HRDE-1 targets. The log<sub>2</sub> ratio of SF-HRDE-1 co-IP to total small RNA levels (y-axis) and the mean values of co-IP and total small RNA levels (x-axis) are plotted for all 1-kb regions of the genome.

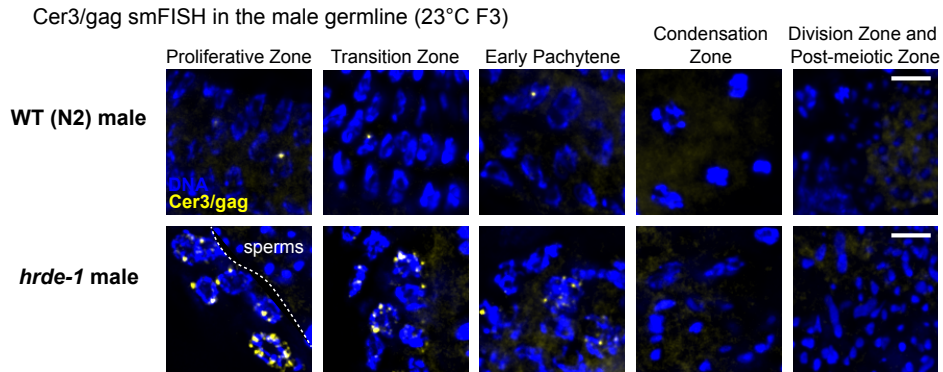

**Figure S2. Cer3/gag smFISH signals at different stages of adult male germline (23°C F3).**

Scale bars: 5  $\mu$ m.

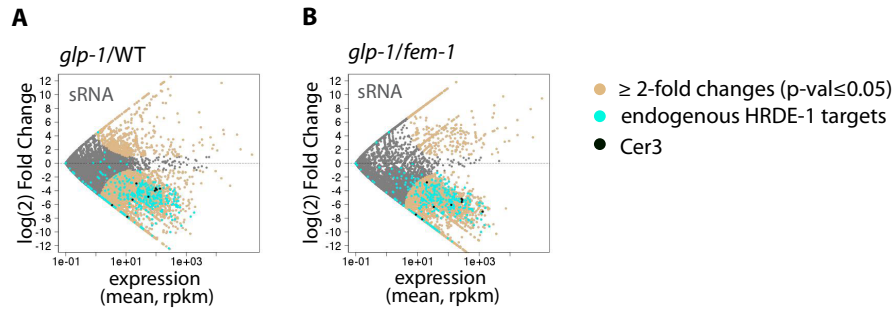

**Figure S3. Endo-siRNAs of the endogenous HRDE-1 targets are enriched in the germline.**

(A) Scatter plot for wild type and *glp-1(e2141)* adults (25°C for both) with the log<sub>2</sub> ratio between the two samples plotted in the y-axis and the mean small RNA expression of the two samples plotted in the x-axis. *glp-1(e2141)* is a temperature-sensitive germline deficient mutant. (B) Scatter plot for *glp-1(e2141)* and *fem-1(hc17)* adults (25°C for both) with the log<sub>2</sub> ratio between the two samples plotted in the y-axis and the mean small RNA expression of the two samples plotted in the x-axis. *fem-1(hc17)* mutant animals are sterile at 25°C due to the temperature-sensitive defect in producing the male germline; the female germline is normal in the mutant adults. For both (A) and (B), we used sRNA-seq data of Gent, et al. (PMC2838994).

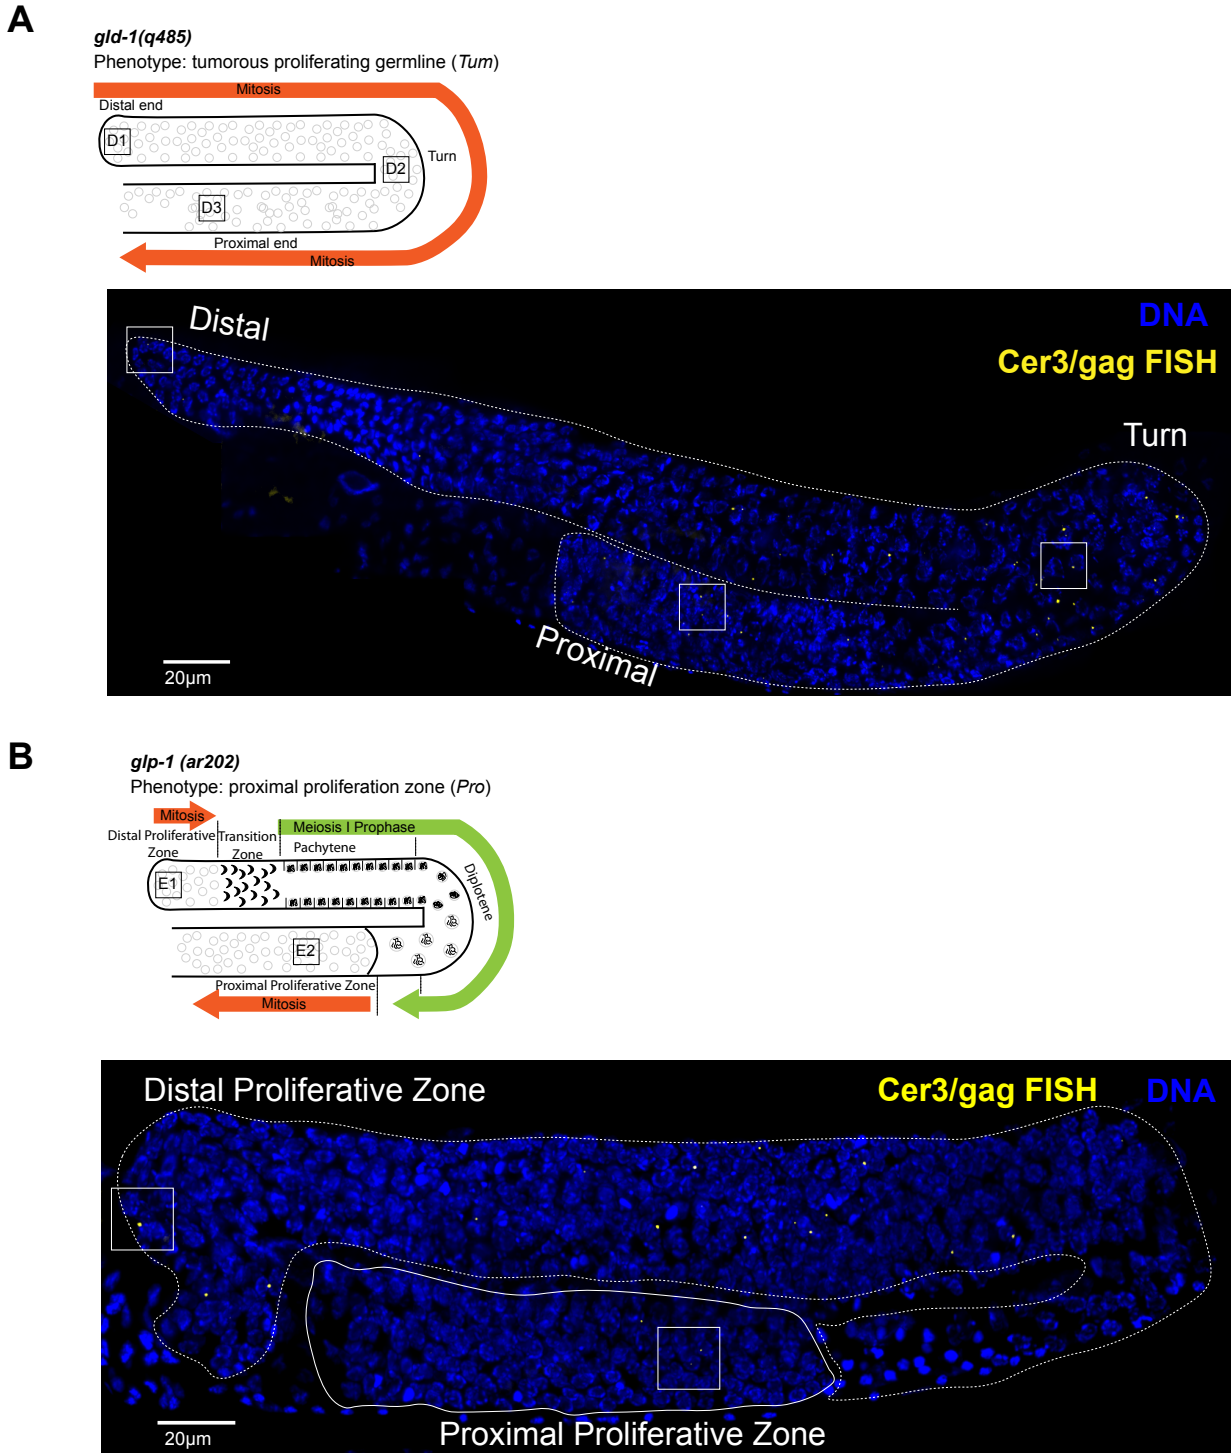

**Figure S4. Cer3/gag smFISH distribution in *gld-1(q485)* and *glp-1(ar202)* gonad.**

(A) A schematic diagram of *gld-1(q485)* tumorous germline phenotype and Cer3/gag smFISH in the entire *gld-1(q485)* gonad. The selected regions showed in Figure 1H are marked with white squares. (B) A schematic diagram of *glp-1(ar202)* gonad phenotype (proximal proliferative zone) and Cer3/gag smFISH in the entire *glp-1(ar202)* gonad (25°C). The selected regions showed in Figure 1I are marked with white squares. Scale bars are 20µm.



**A**

Cer3 and Cer8 smFISH in gonad cytoplasmic core shown with background (minimal display value set to 0) .

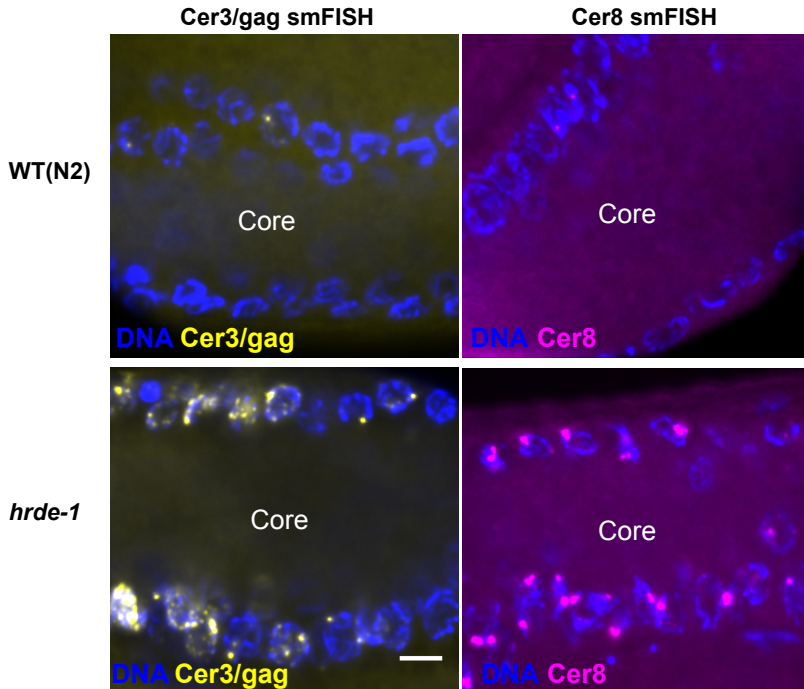**B**

*oma-1* smFISH images shown with background (minimal display value set to 0)

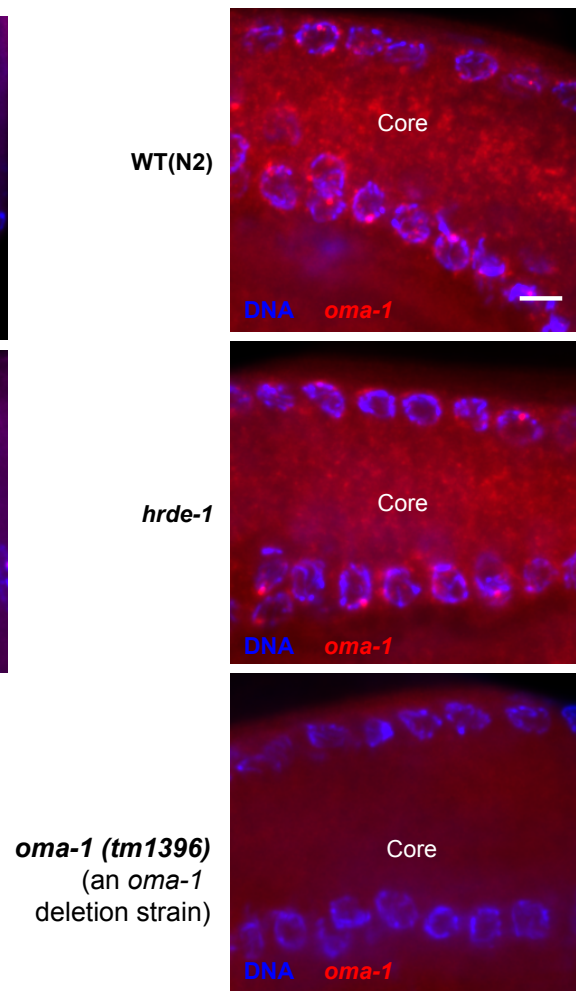

**Figure S5. Cer3, Cer8, and *oma-1* smFISH images (same as the ones in Fig.4) without background reductions.**

For all images, minimal display value was set to 0 in ImageJ to show background fluorescence. The image shows a representative longitudinal section through the gonad core of pachytene stage. **(A)** smFISH against Cer3/gag, Cer8 in adult WT (N2) and *hrde-1* pachytene germline (23°C generation 3). No Cer3/gag and Cer8 smFISH spot is observed in the cytoplasm core. Scale bar: 5  $\mu$ m. **(B)** *oma-1* smFISH in WT (N2), *hrde-1* mutant, and *oma-1* deletion strain, *oma-1(tm1396)*. (23°C generation 3). *oma-1* smFISH signal is present in both nucleus and cytoplasm core of WT(N2) and *hrde-1* mutant strain, and is absent in the *oma-1* deletion strain, *oma-1(tm1396)*. Scale bar: 5  $\mu$ m.

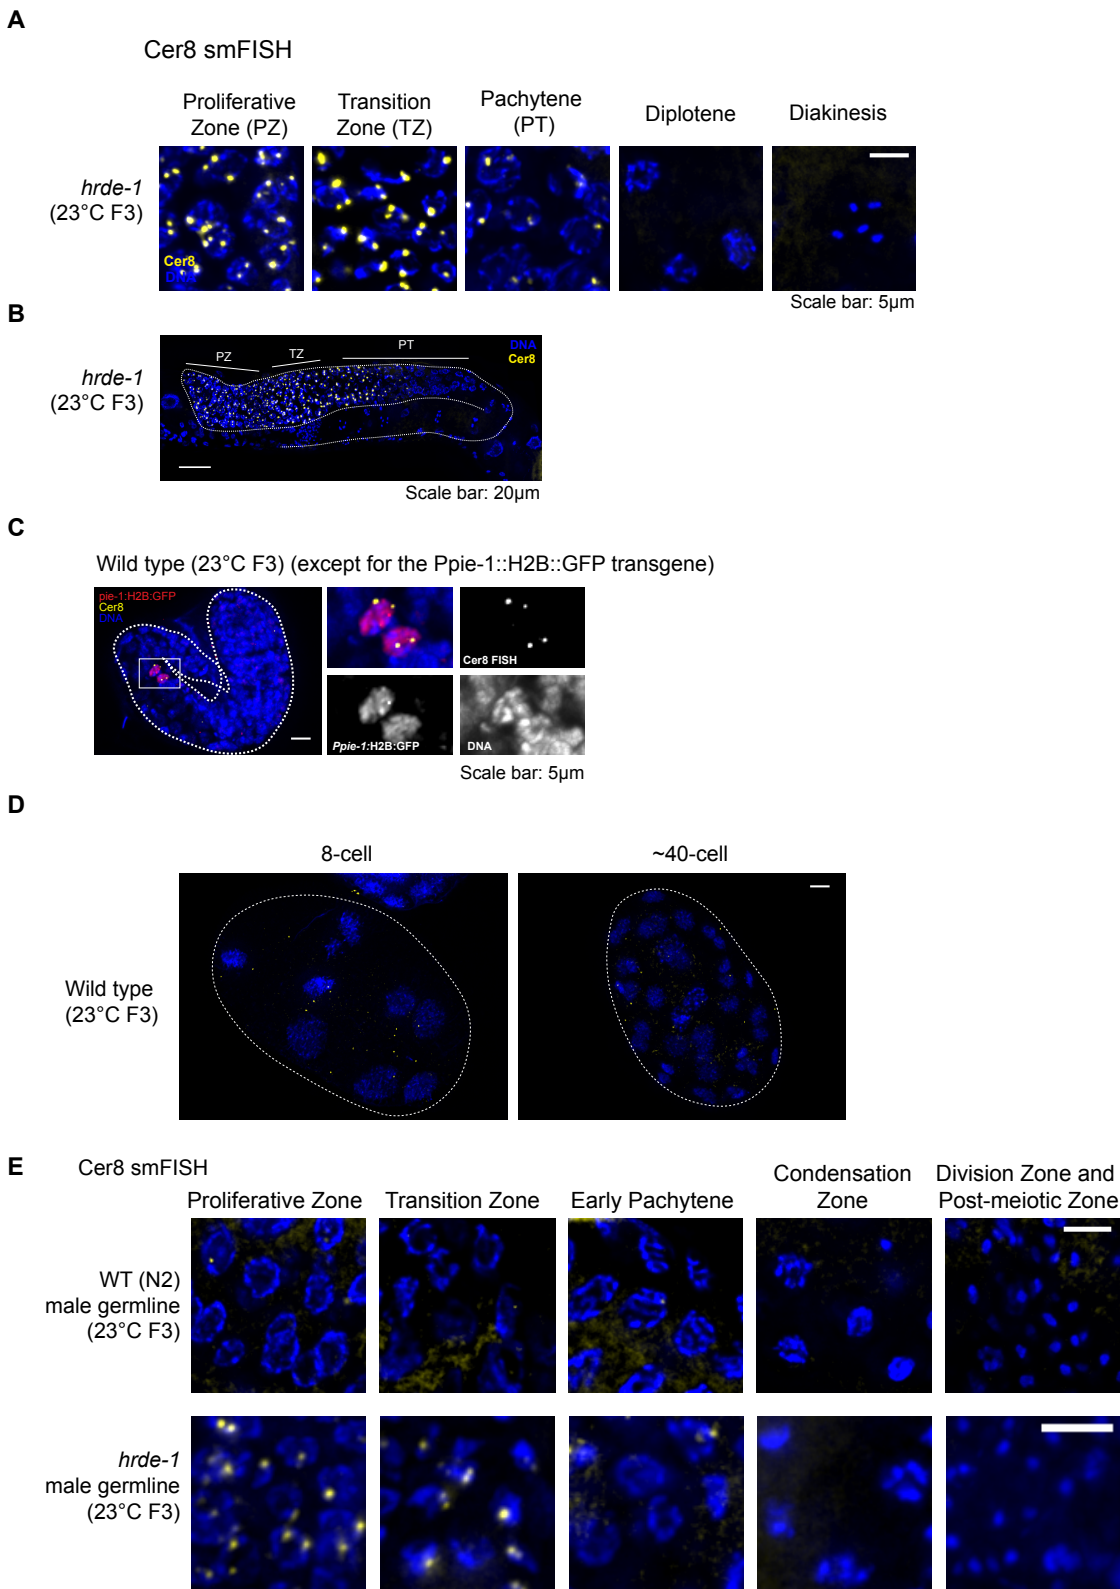

**Figure S6. Cer8 smFISH analysis.**

(A) Cer8 smFISH at different germline developmental stages in *hrde-1* adults (23°C). Scale bar: 5  $\mu$ m. (B) A full gonad view of Cer8 smFISH signals in *hrde-1* adult (23°C). The gonad is outlined. Scale bar: 20  $\mu$ m (C) Simultaneous detection of *pie-1* promoter driven GFP::H2B (immunofluorescence with anti-GFP) and Cer8 RNA with smFISH in a pre-hatching embryo (23°C). The strain carries a *Ppie-1::GFP::H2B* transgene in a wild type genetic background. Scale bar: 5  $\mu$ m (D) Cer8 smFISH in 8-cell and ~40-cell embryos. Scale bar: 5  $\mu$ m (E) Cer8 smFISH in WT(N2) and *hrde-1* mutant male germline (23°C). Scale bar: 5  $\mu$ m

**A**

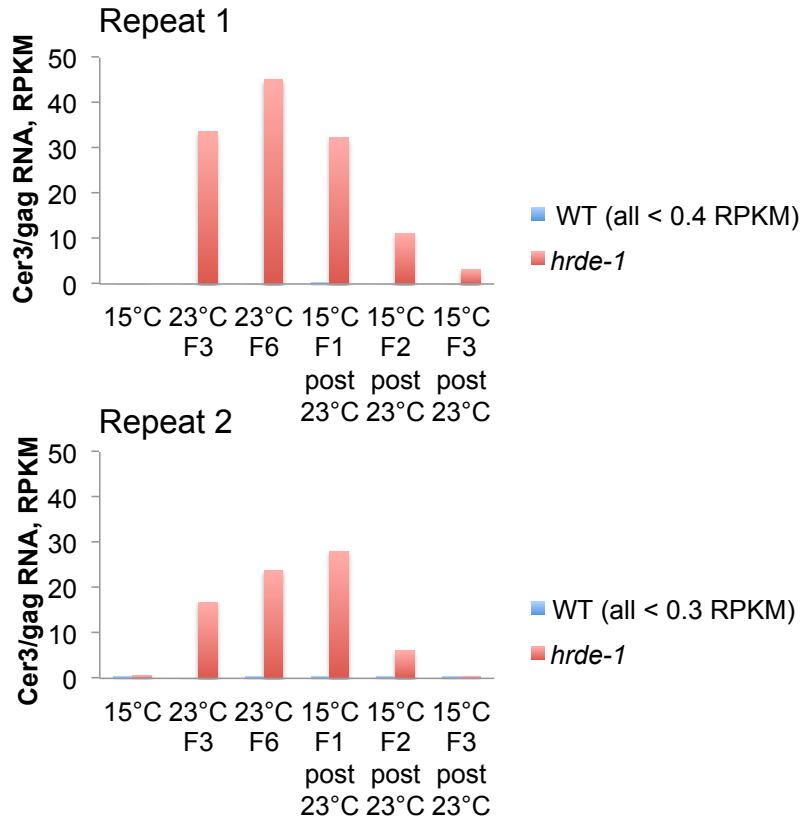

**B**

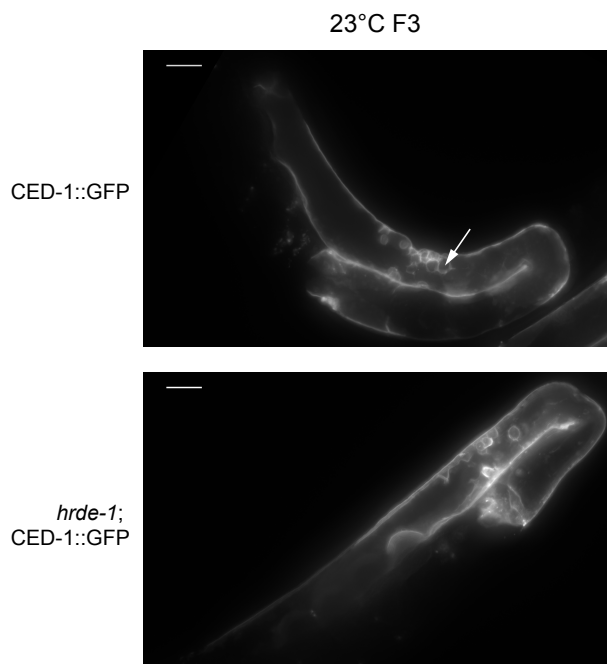

**C**

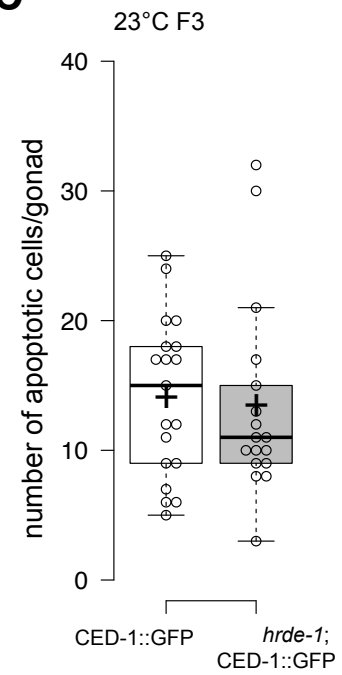

**Figure S7. Effects of heat stress on Cer3/gag RNA and germline apoptosis.**

(A) mRNA-seq analysis of Cer3/gag expression in WT(N2) and *hrde-1* adults during multigenerational temperature shift experiments. The two plots used mRNA-seq data from Ni et al., 2016. Two biological replicates. (B) CED-1::GFP expression in adult gonad sheath cells at wild-type (N2) and *hrde-1* mutant background (23°C generation 3). Arrow points to an example of engulfed apoptotic germ cell. Scale bars: 20  $\mu$ m. (C) Number of CED-1::GFP marked apoptotic cells per gonad arm for wild-type (N2) and *hrde-1* mutant (23°C generation 3). Center lines show the medians; crosses represent sample means; box limits indicate the 25% and 75% percentiles; whiskers extend 1.5 times the interquartile range from the 25th and 75th percentiles. Each circle represents count from an individual gonad arm (n = 19, 17); Mann–Whitney–non-parametric tests: not significant.

**A** Levels of RNA-seq reads of different methods that mapped to large introns (2-10 kb).

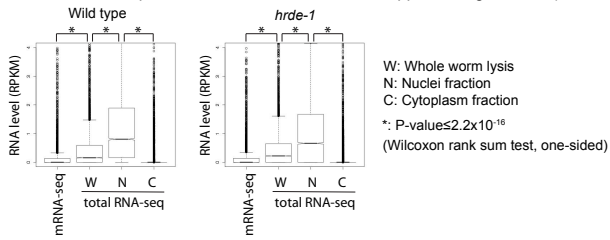

**B**

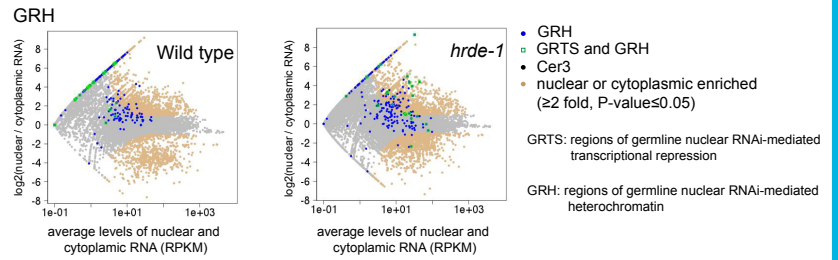

**C**

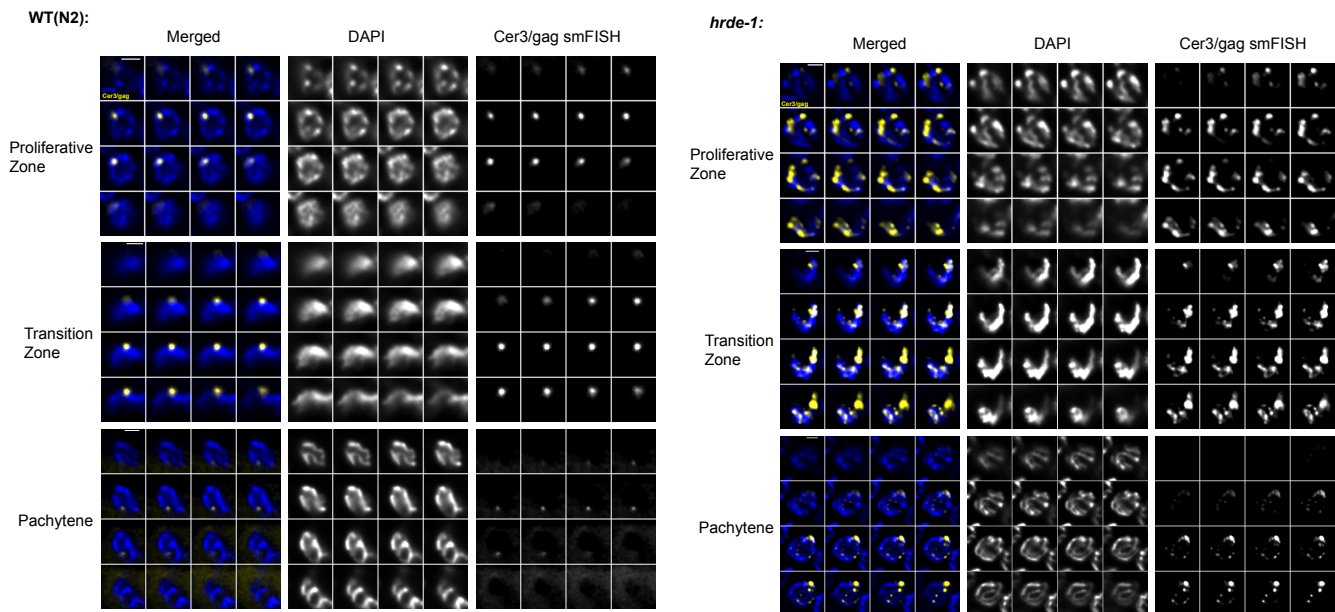

**Figure S8. Nuclei and cytoplasm fractionation and RNA-seq analysis**

(A) Box plot analysis for the levels of reads that are mapped to large introns (2-10 kb) from different RNA-seq methods (mRNA and total RNA; different fractions of total RNA). (B) RNA-seq analysis of nuclear and cytoplasmic RNA samples from WT (N2) and *hrde-1* mutant adults. The average nuclear and cytoplasmic RNA expression levels (RPKM, x-axis) and the log<sub>2</sub> ratios of nuclear to cytoplasmic RNA level (y-axis) are plotted for all 1-kb regions in the genome. Regions with at least 2-fold differences ( $p\text{-value} \leq 0.05$ ) are colored in beige. (C) Cer3 smFISH signal shown in a montage of 16 0.2  $\mu\text{m}$  optical sections of a nucleus in proliferative zone, transition zone, and pachytene of WT (N2) and *hrde-1* mutant germline. Scale bars: 2  $\mu\text{m}$ .

## Table S1. smFISH target sequences and probe sequences

Probe name: Cer3\_GAG

Dyes: CAL Fluor® Red 610 Dye, Quasar® 670 Dye

Cer3\_GAG target sequence:

```
atgtcccgaacccgcagttcaatacacccccacccaatgctccagatggcgcttatcgctcgaacagtcg
tttgattgatggctccgctcgtcaccactgcttatctcgttttcgctcaaagctggtaccgtaaggatgtca
actcgtttgatggttccatcgtggagaacaaggcaacagtgaaagcagtcgacgataaaggctcgtggtcatt
ggcaacaagtgtgatgatgctcagcgcgaaagcttgagctttgcaaaatcgaattcgcgagctcgaggacat
ggtaacgctcaaggtgaggagtgctcaggctggtagaggcgtgctggaggctcgcggtacctctggcc
cttctcaggtagctggcctgagcctaggtaggccacttttaattctaatttaacccccaaagagacgtgttg
tctggaagcagtgacggttagtaacgctactgactcttctggaagtggatccccgatgccatcgagctctca
gaatcgtgacgctcgtcgaagaacaatcggaaagatcagcaactcaatagtggtgagcttgccgggagatcaag
atgatctagaagaagcaacaatcgaattcgtggaatttcgccttcaattggagtgatcggtttcaagaca
gccgccactttgcctccgttcaatggaaacttgactgaagatttcacaacctcgtgcaaaagttaagga
tcggctagcagcgtctacagagatggacaacgatcaaaagaggtctacattccttttatttttggacaact
gcgcgcggagtacggccgatggaaataattggagcagcagcctgcgattacactcgaggatcttatcacaag
atgtagcagtggttcgagaatgcagccgtgcaggaacatagagaagagcagttgagatattgcacacagca
aaagggtagtcggttgaactttctttcagagaatcgataagctgcaaaagacttgcgagtagtgcccca
ggagtgaaagatgaagaaggtcgcgtttcgtgctttcctcgaaggactcggtagaacatctcaactacgct
attcgcagcagggcgcccaaggatagggcggcgctcgcgatgaagcactacatgaagaatgcttgtcaa
tgcaatgtggctcggagagcagtagcaacagcagcggcacaatggcattcaatcgggaatcaaggcaaga
agcagcagcagcagaagcagtcgagtcgcccgaagttccttggaagatggcattactgtcacaagaagggt
cacaactcgcagattgtcggaaagagagcagctgatcgtggtgtggcaaaatcctcagtgcaaaatcccgt
ggagcctcatcaagtcgaagcaggcagcagcagtttcgggacagaaaaattggcaacttctggaacagaaca
cggctctgcaagcgaagttcagagaccttgagctggcttgcgctttccaacctcagctttgacggatc
tcgggggcaacggttgcagctgacttggcgaagagtaagtctttacttttcgaggtgacacctcctca
acagaattctcaagtaattctttatcacccgctcacattccagttaaagctaatcagataccgtattccg
ctcttggtgatacgggtgcaaacattacagtaacttcgaaagatcttttgaaaggtcttggttagcaga
actttaccgatgctcaatgcaagctggtggccttgagggtcacacagtggtatgggtggatcagcagc
cgttcaattcaagattggaactcacacgatcgaccatcgggtacacttcacaactggacggttgatgccg
aatcaatggcgaatatcaattcattattggaaacgatatgctctcgaagcttccaatgctcgtgttcaac
tacaaggatgctcttttccacatcggagatgacgttcttctcctcggacaatcattcggacaaccttcaaa
gccaaggaagttcaacgtcaagtggtgaggatactatcattccagctggaacggaaaaatcagtcgaat
gctcgcgctcctcaaccgaaggatcgagaagttattttgatgatcgaactcagtttcaagtggaatcgat
aatttggttggtcaccgcggttagtcaggtcaggtcaggtcattttggtgtccaaccaacggatca
ggacatgacgctcaacaattcggaggttgctgctcggccta
```

Cer3\_GAG smFISH Probes:

```
caaacgactgttcgagcga
gataagcagtggtgacgacg
gtaccagctttgagcgaac
ttatcgtcgaactgctttcac
catcacacttggtgccaatg
gagctcgcgaattcgatctt
acacgtctcttgggggttaa
cacttcagaagagtcagta
cacgattctggagactcgat
tgatcttccgattgttctt
aagctcaccactattgagtt
gttgcttcttctagatcatc
atcactccaattgaaggcga
ccattgaacggaggcaaaag
aactttcgcacgaagggtgt
tgtagacctcttttgatcgt
gtgataagatcctcagagtg
```



```
tctcgaacactgctgacatc
ctcaactgctcttctctatg
caagtctttgcagcttatcg
gaaagcacgaaacgcgacct
gtagttgagatgttcaccga
ttcatgtagtgcttcatcga
cacattcgcattgacaagca
aatgccattctccaaggaac
cgacaatctgcgagtttg
tgcttgacttgatgatgctc
aagttgccaatcttctgtgc
aagatccgtcaaagctaggt
acttactcttcgaccaagtc
gaattctggtgaggagtggc
ctggaatgtgagcggtgata
gagcggaaatcggatctga
ttactgtaatgtttgcaccc
agttctgctaataccaagac
attgaacgactgctgatcca
atcgtgtgagttccaatctt
caacgtccagttgtgaagtg
aagcttcgagagcatatcgt
gcatcctttagttgaacac
aagaacgtcatctccgatgt
aggttgtccgaatgattgtc
ttgacgttgaacttccttgg
gctggaatgatagtatcctc
gcatttgacgtatcttccg
ataacttctcgatccttcgg
caccaaaatgactgcatcct
cgaattggtgagcgtcatgt
```

-----  
Probe name: Cer8

Dyes: CAL Fluor® Red 610 Dye, Quasar® 570 Dye

Cer8 target sequence:

```
ctttccattccaatgcttgctcggatgcgcatgtgtgctcctcctcgtacccaccatccgcgccaccatgata
actccgagccctgcgaaactcgtcgaatggcgcagctctgcacgatttctactatgaaatcggcgaagagc
gctccatttgaagaaatccaagtcctccacatcgctgagtagtgacagccaacccatccacgtctaata
caagaattcacaacatcaacagcctcgaatcaatctagttcgaacctgcactcaaaaaccggaaaaag
aaagcagaatggcatgatcaacaaccgcgatactacagattccccagccccggagcatttgagcagaaggc
gggaaagaaggaaagcaaccaaggaaaaacgaggtgggtttgctgttttattccggggaaaagagaatgagtt
gaggaaaagctgagggaaaagagactgaactccgtgaattagaagttcctttaggaggagagtgctctgac
cagctccaggacgccagtcagaatgattggctagtagaccagaaaatggacagaaagagaaggcggagca
ctagctctgaccttcgatccactactacctaccacaagttgaactttcctaataatcgttggttagttgttc
ttttattaccggtttcctactcaactattccaccaccgcggtttatttctcaaatctcaccacacacctgc
gtccttccccggtttctccccagctctctttaaactccgtcagtgcatgaggggctgtaataattagctataatt
tatctcccaataaaaaccggttacaataagcctttctctccattcctcatcgcttattatcatgagctcctaactc
aatcattatctttaaattaaaattattattatccattaaaaagtcctgagggagaaaggatccagcctattta
gttccgagttaccaccactaccacagatcttccccgtaagactggtgatgattaatcaatcaatagtagtact
taagaggaatgacagatggaagaacttaaaaatacttaaatatttaaaaattaataaaaataaaacatcaa
attaataactccaattccgaatctatgtagcgttcattctttggattagagtcatttaaaaacttaataaa
aaataaaaaacaaggttatagaggtgtgaaggtcgtgacaaggacactgtgagacagatatctcctgtgc
gggcccgttgcatctttacacctctgtccctttgatcagtttaatagtagatcagcagattgaaataggaac
tgaccgggagcattcacgaggaaatgtgaacaaaaaattatctgtattgaaatgacacagctgagcttgcg
cgctttaaagttacgggttaggatttgaaactagttgggttataacacgtgatcgattgtctagagtcagtg
```

cagcatgactctggctattaacatgaaatccgtgctgactgtcatattagaaaatggcattctagacag  
tacagaacataatacatcttgtgaatatttctttccgtttccttttcttaccacacattgtacgtatgtgg  
cctgagtgagaaaaggaacagcagttgaaatacagataaattttgggaaactaccccgagaaccccgatc  
atcgatcccttttctttcagaacacagtgtagactgagtgatgattatcatgagcttgtgtgtgaggat  
tatctacttagagtcgggtcacgcaattaaacatatatttaatacaccactcactcataagttagaataa  
ccctcacgcgcgcgcaaaaagcccacatctcagcatcctcgcacccatcttaactcctcaataaaacaaa  
aaatcgctcgatccagccaaatcaaatgcattccggaatgcgtaggaacccgaggcattataatgctgg  
tagagtttgactccaaagagaaaccattctttgaacaacttcattttttggatctogccaccaaggccct  
gagactgtacaca

Cer8 smFISH Probes:

tccgagcaagcattggaatg  
tacgagaggacacacatgcg  
tagaaatcgtgcagagctgc  
ttcaaattggagcgtctctcg  
cgatgtggaggacttggatt  
ttagacgtggatgatgggtt  
atctcgaggctgttgatgtt  
gtgcaggtttcgaactagat  
ctttcttttccggtttttt  
tatcgcggttggatgatg  
taaaacgcaaaccacctcg  
ctcaactcattctcttttcc  
aattcacggagttcagtcctc  
cactctcctcctaaaggaac  
tcaatttcttgactggcgtc  
tgtccattttctggtactag  
gtagtggatcgaaggtcaga  
aaacgcgggtgggtggaatag  
ggtgttgggtgagatttgag  
actggggagaaacggggaag  
taatattacagcccctcatg  
ttctccctcagacttttttaa  
gtggtggtaactcggaaacta  
tcttacggggaagatctgtg  
aagttcttccatctgtcatt  
cttcacaacctctataacct  
ggagatatctgtctcacagt  
ggtgtaaagatcgcaacggc  
agttcctattcaatcgtcga  
tcacatttctcgtgaatcg  
ctcagctgtgtcattcaata  
aacgtaacttaaagcgcgc  
ccactggactctagacaatc  
tcagcacggatttcatgttt  
ctgtctagaatggccatttt  
caggccacatacgtacaatg  
tgtatttcaactgctgttcc  
gggtagtttcccaaaattt  
aaaggatcgatgactgggg  
atcatcactcagtcacacac  
gtagataatccctcacacac  
tatgtttaattgcgtgaccc  
acttatgagtgagtggtcgt  
tgaggagttaagatgggtgc  
tgaatttggctggatcgagg  
taccagcattataatgcctc  
tggtttctctttggagtcaa

cttgggtggcgagatccaaaa

-----  
Probe name: oma-1

Dye: Quasar® 570 Dye

oma-1 target sequence:

atgaacggttaacggtgaaaacaacgagaagatcgatgagcatcatctcgagagctccctcgctggcgttcc  
aactttgcccgtttaccactcgatcacgctaaggacttgtctcaaactaatccgaatgccagattggag  
atttggttactcaaactgctaacttgattgctatcaaaaagcagttgcttgaagatattgcattcaacaa  
catattcaatcgatgcaagttcgcgcgattcagagtttcccagaacaaccaggttgacactccatttca  
acagtttgatcctagacgccgcggattagcccgaatgcagaaaccagaatcatacaagactgtgatctgcc  
aagcttggctcgaatctaagacttgttctttcgcagacaactgccggttgcacatggagaggaggaactt  
cgtccaacattcgtcgagccgctgcagaacaataagtataaaacgaaactctgtgacaaatatacgactac  
aggactctgccatagcgggaaacgggtgccttttcattcatcccgatcatggaccaaacgcatacattcgcg  
ctgataaacttcttgaagtttctcaacgccatgcattggctgacattcgtgatcaaatggagcagcacatc  
atgactaatggctcgcattgcagctccccgcctttctgccattcagcatcctttagaaatgtttgccaggcc  
atcaactccagatgagccagcggctaaattgccactaggaccaactcctgttagtactcgtgggtccaagat  
atgagctaccaacgaaggaattgcatgacgcggaaggtgcgatgacctatccaccgtctcgtggccattg  
gatccatcgatgtttgctctagacgcttggaaatggcacatcggccagctagtccactcgattcgatggt  
tttgggttccgctccaaatgctggctcgttccggaatgctcggaaagcaaaatactcctggaggagtttctg  
gatattcatctgctggatccacgccttctcaggatctcagttctctcgtcactcaatgcagcatccgcagct  
gccgctgctgcataatttcgcaaatctcgtggttgcctcaatctctctgatgaaatctgctcgaactgatcc  
aatgatgcatgtaacggaccattctctccaatgccaggattcgcataattggccgaaaatgatgaccaagc  
atctcaatttgggtga

oma-1 smFISH probes:

cgttgtttcaccgttaacg  
tctcgagatgatgctcatcg  
aaagtgggaacgccagcag  
gtgatcgagtgggtgaaacgg  
ttagtttgagacaagtccct  
caaatctccaatctgggcat  
tcaagttagcagtttgagta  
agcaactgctttttgatagc  
gttggttgaaatgcaatatct  
cgcgaacttgcatcgattga  
gttctggggaaaactctgaa  
gaaatggaggtgcaacctgg  
cggcgtctaggatcaaactg  
ttctgcattcgggctaactc  
gcagatcacagtcttgtatg  
agtcttagattcgagccaag  
ggcagttgtctgcgaaagaa  
gaatgttggacgaagttcct  
tacttattgttctgcagcgg  
tttgtcacagagtttcgttt  
tatgggcagagtcctgtagt  
aatgaaaaggcaccgtttcc  
tatgcgtttgggtccatgatc  
caagaagtttatcagcgcga  
ccaatgcatggcgttgagaa  
gctccatttgatcacgaatg  
tgcgaccattagtcgatgatg  
tgctgaatggcagaaagcgg  
ggcctggcaaacatttctaa  
tggtoctagtggcaatttag

gaccacgagtactaacagga  
gagacggatggataggatc  
acatcgatggatccaatgg  
atattccaagcgtctagag  
cgaatcgagtggactagctg  
tttggagcgggaacccaaaac  
ttccgagcattccgaacgag  
aaactcctccaggagtattt  
gatccagcagatgaatatcc  
actgagatcctgagaaggcg  
atgctgcattgagtgacgaa  
ttgcgaaatatgcagcagcg  
agagattgagcaacagcaga  
agttgacagatctcatca  
ccgttacatgacatcattgg  
tcctggcattggagagaatg  
tattttcggccaattgatcg  
ccacaaattgagatgcttgg

**Table S2.** List of NGS libraries used in this study

| Sample name                                                 | Library name                           | Type of library |
|-------------------------------------------------------------|----------------------------------------|-----------------|
| N2 adult total sRNA                                         | SG0616b_lib11                          | sRNA-seq        |
| HRDE-1 co-IP sRNA                                           | SG0616b_lib13                          | sRNA-seq        |
| N2, 25°C, sRNA<br>PMID:20116306                             | GSM503822_Gent_N<br>2_P-independent_3  | sRNA-seq        |
| BA17 <i>fem-1(hc17)</i> , 25°C,<br>sRNA, PMID:20116306      | GSM503834_Gent_fe<br>m-1_P-independent | sRNA-seq        |
| CB4037 <i>glp-1(e2141)</i> ,<br>25°C, sRNA<br>PMID:20116306 | GSM503833_Gent_gl<br>p-1_P-independent | sRNA-seq        |
| N2 total RNA, repeat 1                                      | SG0117_lib34                           | RNA-seq         |
| N2 nuclear RNA, repeat 1                                    | SG0117_lib35                           | RNA-seq         |
| N2 cytoplasmic RNA,<br>repeat 1                             | SG0117_lib36                           | RNA-seq         |
| <i>hrde-1</i> total RNA, repeat 1                           | SG0117_lib37                           | RNA-seq         |
| <i>hrde-1</i> nuclear RNA,<br>repeat 1                      | SG0117_lib38                           | RNA-seq         |
| <i>hrde-1</i> cytoplasmic RNA,<br>repeat 1                  | SG0117_lib39                           | RNA-seq         |
| N2 total RNA, repeat 2                                      | SG0117_lib40                           | RNA-seq         |
| N2 nuclear RNA, repeat 2                                    | SG0117_lib41                           | RNA-seq         |
| N2 cytoplasmic RNA,<br>repeat 2                             | SG0117_lib42                           | RNA-seq         |
| <i>hrde-1</i> total RNA, repeat 2                           | SG0117_lib43                           | RNA-seq         |
| <i>hrde-1</i> nuclear RNA,<br>repeat 2                      | SG0117_lib44                           | RNA-seq         |
| <i>hrde-1</i> cytoplasmic RNA,<br>repeat 2                  | SG0117_lib45                           | RNA-seq         |
